# Supplementary material
Source: PubMed Central journal article supplement (PMC6594170)
Supplement: NIHMS1530793-supplement-1.pdf [file NIHMS1530793-supplement-1.pdf]

Electronic Supporting Information to accompany:

## Understanding Material Characteristics through Signature Traits from Helium Pycnometry

Huong Giang T. Nguyen,<sup>a\*</sup> Jarod C. Horn,<sup>a</sup> Matthew Bleakney,<sup>a</sup> Daniel Siderius,<sup>a</sup> and Laura Espinal<sup>a\*</sup>

*<sup>a</sup>National Institute of Standards and Technology, 100 Bureau Drive Gaithersburg, Maryland 20899, United States*

### **Table of Contents**

|                                                                                      |    |
|--------------------------------------------------------------------------------------|----|
| Cover sheet                                                                          | S1 |
| Figure S1. Powder X-Ray diffraction pattern for MIL-53 LT and its simulated pattern. | S2 |

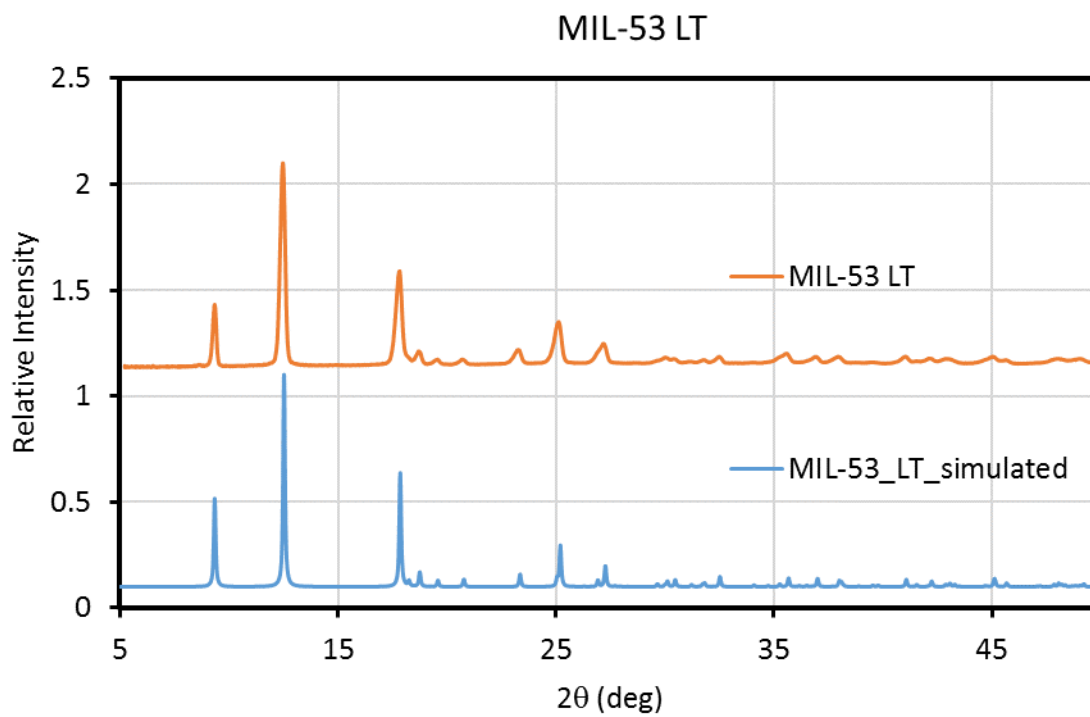

**Figure S1.** Powder X-Ray diffraction pattern for MIL-53 LT and its simulated pattern.
